# Supplementary material
Source: PubMed Central journal article supplement (PMC9289709)
Supplement: EMBJ-41-e109777-s001.pdf [file EMBJ-41-e109777-s001.pdf]

## Appendix

### **TRIM27 cooperates with STK38L to inhibit ULK1-mediated autophagy and promote tumorigenesis**

Yi Yang, Yifu Zhu, Shuai Zhou, Peipei Tang, Ran Xu, Yuwei Zhang, Dongping Wei, Jian Wen, Rick F. Thorne, Xu Dong Zhang, Jun-lin Guan, Lianxin Liu, Mian Wu, Song Chen

#### **Table of Contents**

1. Appendix Figure S1. Removal of the RING-BOX-Coiled-coil domain of TRIM27 diminished its interaction with ULK1 (Page 2).
2. Appendix Figure S2. TRIM27 functions independently of NEDD4 and NEDD4L (Page 3).
3. Appendix Figure S3. Verification of gene editing approaches using CRISPR/Cas9 technology in cell lines and mice (Page 4).
4. Appendix Figure S4. Knockdown of STK38L reduces binding between TRIM27 and ULK1 (Page 5).
5. Appendix Figure S5. Mass spectrometry analysis of the phosphorylation sites of ULK1 mediated by STK38L (Page 6).
6. Appendix Figure S6. Bioinformatics analysis of the ULK1 or TRIM27 mRNA level in TCGA database (Page 7).
7. Appendix Figure S7. Titration of ULK1 inhibitors to determine effective minimal concentrations that inhibit autophagy (Page 8).
8. Appendix Figure S8. Inhibition of Ulk1 with MRT68921 inhibits 4T1 cell lung metastasis *in vivo* (Page 9).
9. Appendix Table S1. FIP200 interaction proteins identified by mass spectrometry (Page 10).
10. Appendix Table S2. Antibodies and Reagents (Pages 11-12).
11. Appendix Table S3. Recombinant DNA constructs (Pages 13-14).
12. Appendix Table S4. Oligonucleotide sequences (Pages 15-16).
13. Appendix Table S5. Trim27 interaction proteins identified by mass spectrometry (Page 17).

## Appendix Fig S1

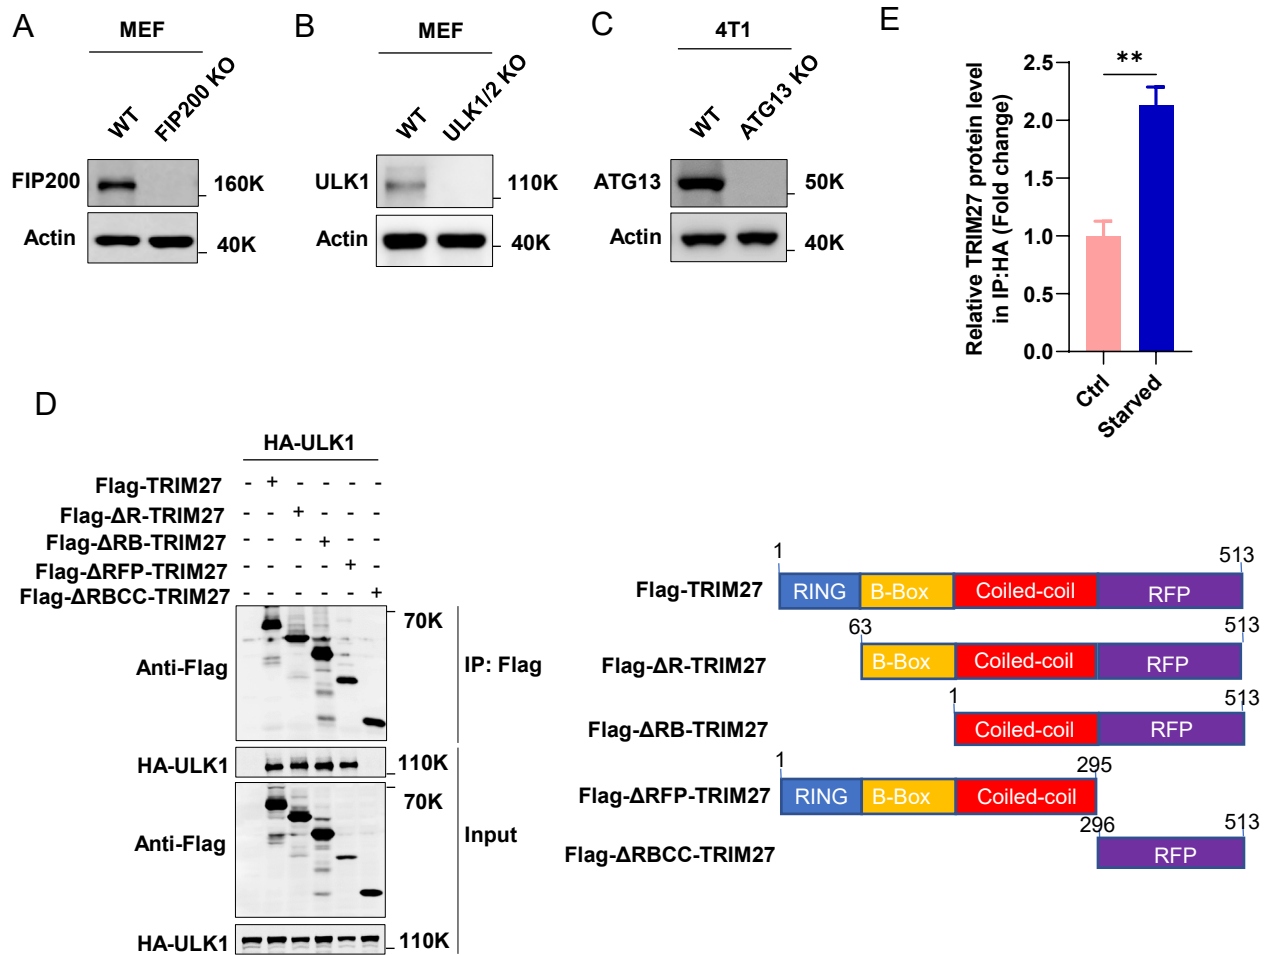

### Appendix Figure S1. Removal of the RING-BOX-Coiled-coil domain of TRIM27 diminished its interaction with ULK1.

(A-C) Verification of gene knockout of FIP200 and ULK1/2 in MEF cells and ATG13 in the 4T1 cell line, respectively, using Western blot. Actin was used as a loading control.

(D) Co-immunoprecipitation assays between HA-ULK1 and the indicated truncated Flag-TRIM27 mutants transfected in HEK293T cells.

(E) Quantification of data presented in Figure 1H shows mean  $\pm$  s.e.m. of three independent experiments,  $P$  values were determined by a two-tailed unpaired  $t$ -test,  $**P < 0.01$ .

## Appendix Fig S2

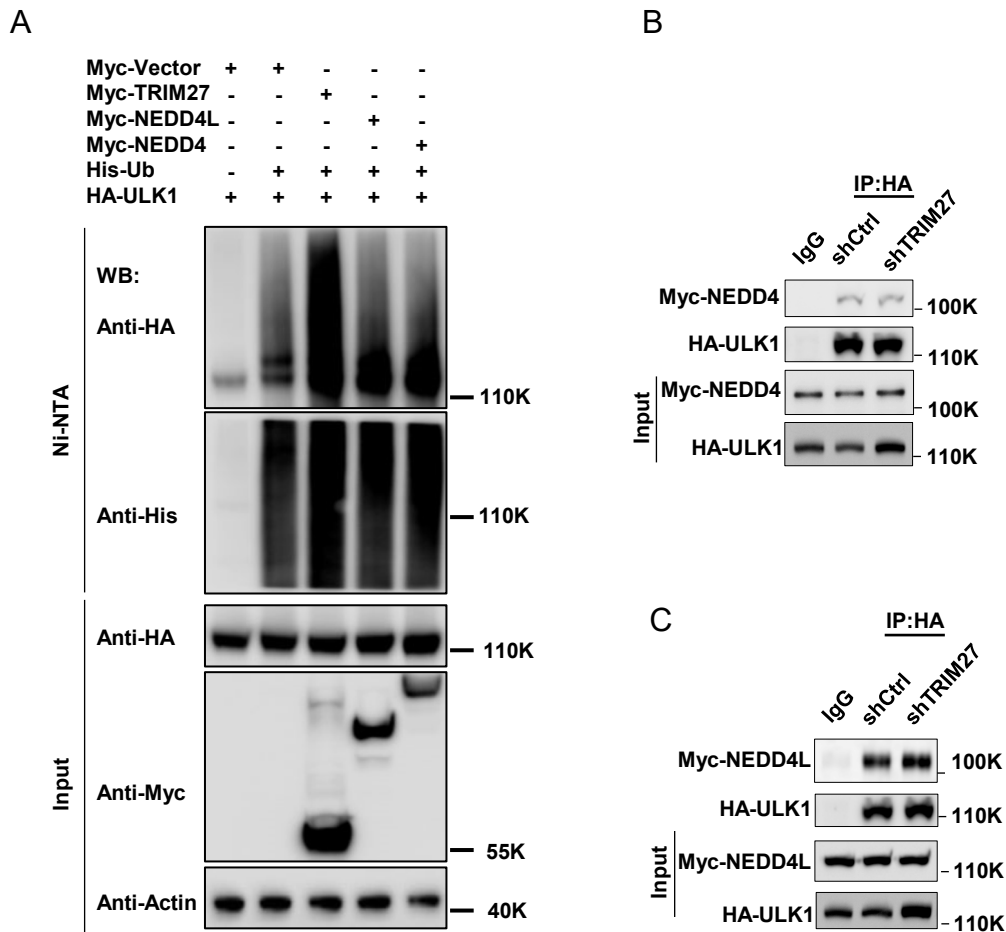

### Appendix Figure S2. TRIM27 functions independently of NEDD4 and NEDD4L.

(A) Ubiquitination analysis of HA-ULK1 in HEK293T cells after co-transfection with indicated constructs.

(B) Co-immunoprecipitation assays in HEK293T cells after co-transfection with HA-ULK1 and Myc-NEDD4 in the presence or absence of TRIM27 followed by Western blotting as indicated.

(C) Co-immunoprecipitation assays in HEK293T cells after co-transfection with HA-ULK1 and Myc-NEDD4L in the presence or absence of TRIM27 followed by Western blot as indicated.

## Appendix Fig S3

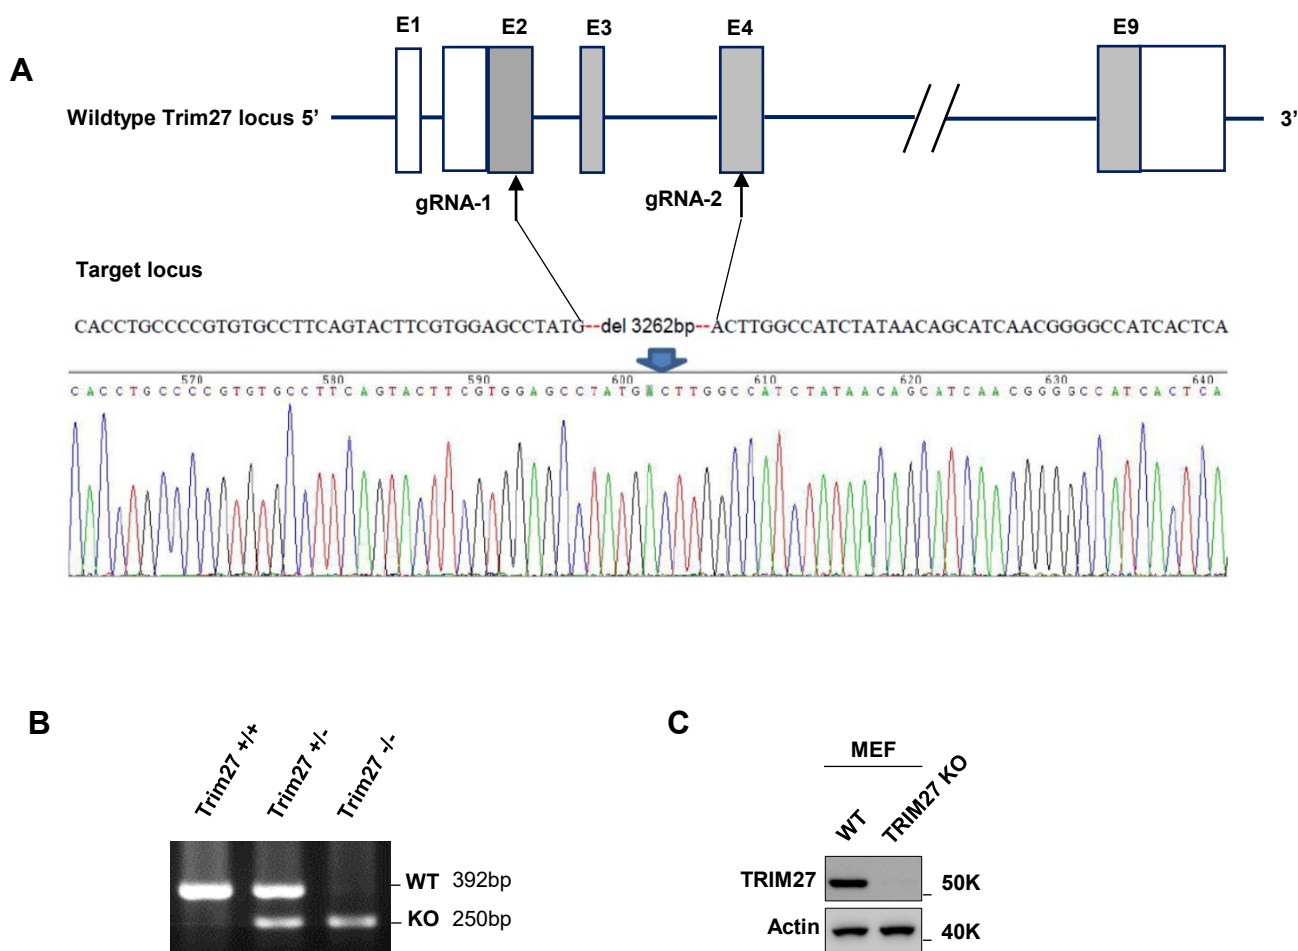

### Appendix Figure S3. Verification of gene editing approaches using CRISPR/Cas9 technology in cell lines and mice.

(A) Schematic diagram of Trim27<sup>-/-</sup> mice construction strategy to create a 3262bp deletion between exon-2 and exon-4. (B) Representative genotyping analysis used to indicate Trim27 knockout (-/-) mice by PCR. (C) Verification of TRIM27 knockout in MEFs isolated from Trim27<sup>-/-</sup> mice by Western blot.

## Appendix Fig S4

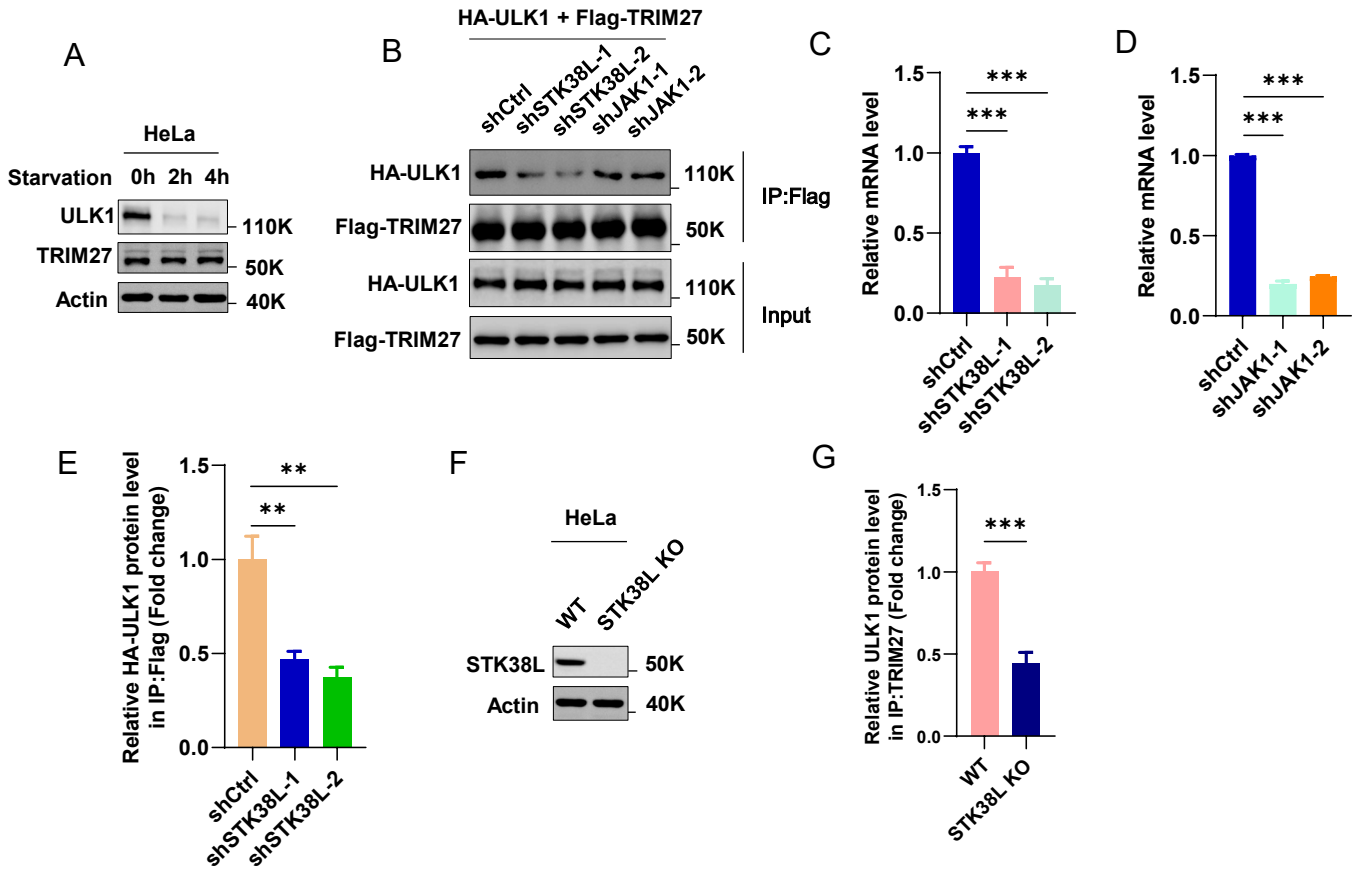

### Appendix Figure S4. Knockdown of STK38L reduces binding between TRIM27 and ULK1.

(A) ULK1 protein levels in HeLa cells starved in HBSS for the indicated times.

(B) Co-immunoprecipitation between Flag-TRIM27 with HA-ULK1 in HEK293T cells after knockdown of the indicated genes. The cells were starved for 1h before immunoprecipitation of Flag-TRIM27 with Flag antibodies before detection of bound HA-ULK1 using Western blotting against HA.

(C-D) Relative gene knockdown efficiency of STK38L (C), JAK1 (D) in HEK293T cells. Data are mean  $\pm$  s.e.m. of three independent experiments. *P* values were determined by a one-way ANOVA with Dunnett's multiple comparisons test. \*\*\**P* < 0.001.

(E) Quantification of data presented in Figure 4E shows mean  $\pm$  s.e.m. of three independent experiments. *P* values were determined by a one-way ANOVA with Dunnett's multiple comparisons test, \*\**P* < 0.01.

(F) Verification of STK38L knockout in HeLa cells by Western blot.

(G) Quantification of data presented in Figure 4H shows mean  $\pm$  s.e.m. of five independent experiments. *P* values were determined by a two-tailed unpaired *t*-test, \*\*\**P* < 0.001.

## Appendix Fig S5

**A**

| Position <sup>c</sup> | Peptide score <sup>c</sup> | Modified sequence <sup>c</sup>            | Mass error [ppm] <sup>c</sup>   | #PSMs <sup>c</sup> |
|-----------------------|----------------------------|-------------------------------------------|---------------------------------|--------------------|
| S 774 <sup>c</sup>    | 88.48 <sup>c</sup>         | mFsVGSSSSSLGSGSSSAR <sup>c</sup>          | -1.29166398650567 <sup>c</sup>  | 36 <sup>c</sup>    |
| S 405 <sup>c</sup>    | 83.3 <sup>c</sup>          | TPSPsPTcSSSPSPSGR <sup>c</sup>            | -1.56674100843157 <sup>c</sup>  | 21 <sup>c</sup>    |
| S 450 <sup>c</sup>    | 70.88 <sup>c</sup>         | IEQLQsPTQQQTAR <sup>c</sup>               | -1.46697365847086 <sup>c</sup>  | 8 <sup>c</sup>     |
| T 754 <sup>c</sup>    | 50.36 <sup>c</sup>         | GGGASSPAPVVFtVGsPPSGATPPQSTR <sup>c</sup> | -0.297675900911386 <sup>c</sup> | 3 <sup>c</sup>     |
| S 757 <sup>c</sup>    | 50.36 <sup>c</sup>         | GGGASSPAPVVFtVGsPPSGATPPQSTR <sup>c</sup> | -0.297675900911386 <sup>c</sup> | 3 <sup>c</sup>     |
| T 653 <sup>c</sup>    | 49.98 <sup>c</sup>         | QGVVmtPPR <sup>c</sup>                    | -0.382470715124909 <sup>c</sup> | 1 <sup>c</sup>     |
| S 494 <sup>c</sup>    | 49.71 <sup>c</sup>         | KLsLGGGRPYTPSPQVGTIPER <sup>c</sup>       | 1.44765022583157 <sup>c</sup>   | 4 <sup>c</sup>     |
| S 465 <sup>c</sup>    | 43.47 <sup>c</sup>         | sGSTSPLGFGR <sup>c</sup>                  | 0.0825802896974214 <sup>c</sup> | 16 <sup>c</sup>    |
| S 614 <sup>c</sup>    | 40.47 <sup>c</sup>         | sPLPILGSPTK <sup>c</sup>                  | -0.234505543237274 <sup>c</sup> | 13 <sup>c</sup>    |
| S 543 <sup>c</sup>    | 33.83 <sup>c</sup>         | PGSsVPEHsPR <sup>c</sup>                  | -1.72472095407573 <sup>c</sup>  | 2 <sup>c</sup>     |

**B**

Sequence: **KLsLGGGRPYTPSPQVGTIPER**, Phospho (79.9663 Da)

FTMS, HCD, z=+3, Mono m/z=797.41364 Da, M<sup>+</sup>H<sup>+</sup>=2390.22635 Da, Match Tol.=0.02 Da

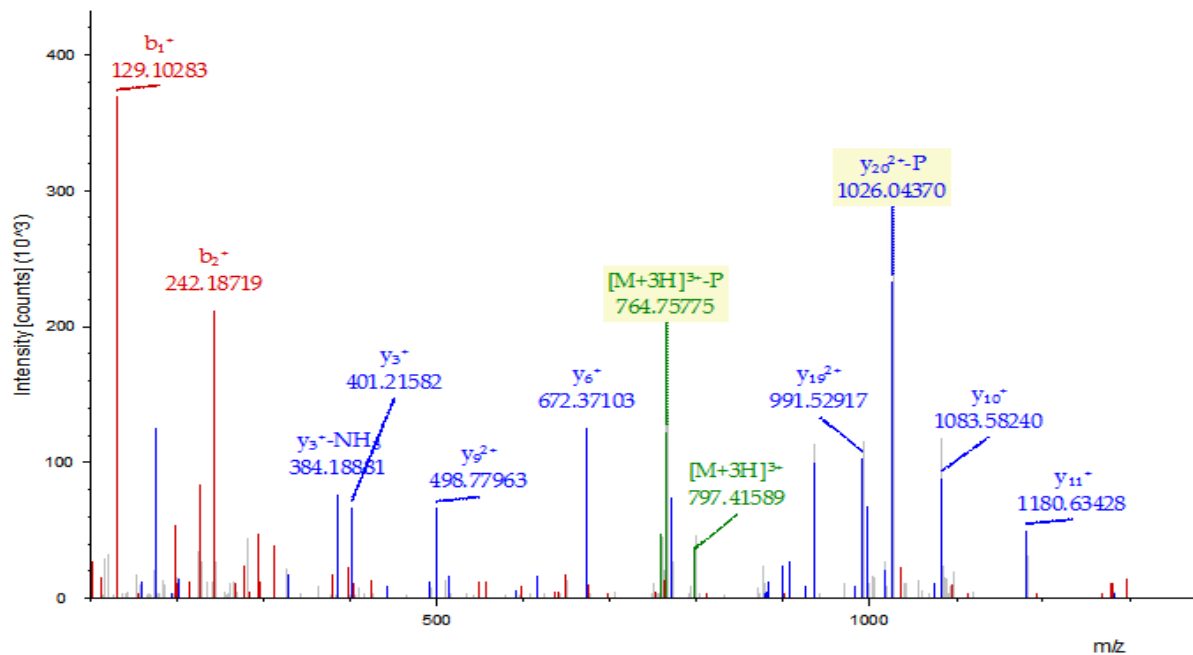

### Appendix Figure S5. Mass spectrometry analysis of the phosphorylation sites of ULK1 mediated by STK38L.

(A) Summary table of potential ULK1 phosphorylation site(s) based on mass spectrographic analysis of HA-ULK1 precipitated from HEK293T cells co-transfected with HA-ULK1 and Flag-STK38L.

(B) MS/MS spectra of the HA-ULK1 tryptic peptide containing the serine 494 residue showing a mass shift of 79.9663 Da consistent with phosphorylation.

## Appendix Fig S6

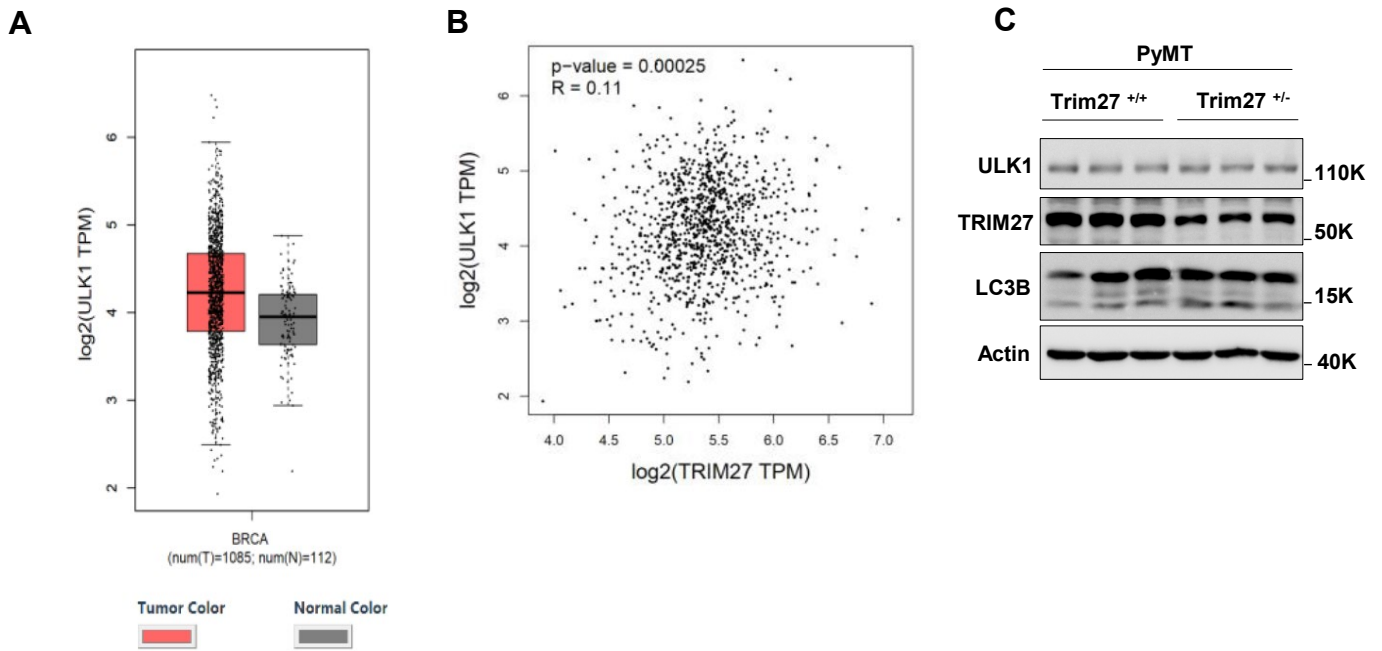

### Appendix Figure S6. Bioinformatics analysis of the ULK1 or TRIM27 mRNA level in TCGA database.

- (A) Relative mRNA levels of ULK1 in normal breast tissues and breast tumors in the TCGA database.
- (B) Analysis of the correlation between ULK1 and TRIM27 mRNA in the TCGA database.
- (C) Western blot analysis of indicated proteins in the mammary tumors of PyMT Trim27<sup>+/+</sup> or Trim27<sup>+/-</sup> mice. Each lane represents a different mouse.

## Appendix Figure S7

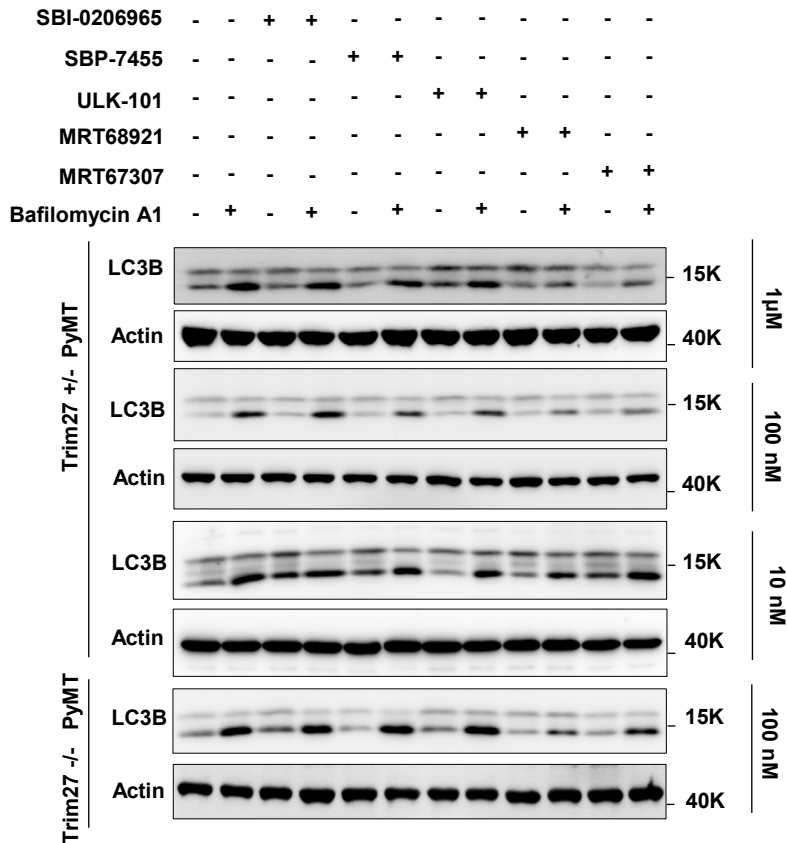

**Appendix Figure S7. Titration of ULK1 inhibitors to determine effective minimal concentrations that inhibit autophagy.**

PyMT-derived mammary cells from Trim27<sup>+/-</sup> and Trim27<sup>-/-</sup> mice were treated with the indicated ULK1 inhibitors or vehicle controls for 24hr. Afterwards, cell lysates were subjected to Western blot analysis against LC3B with actin used as a loading control.



## Appendix Figure S8

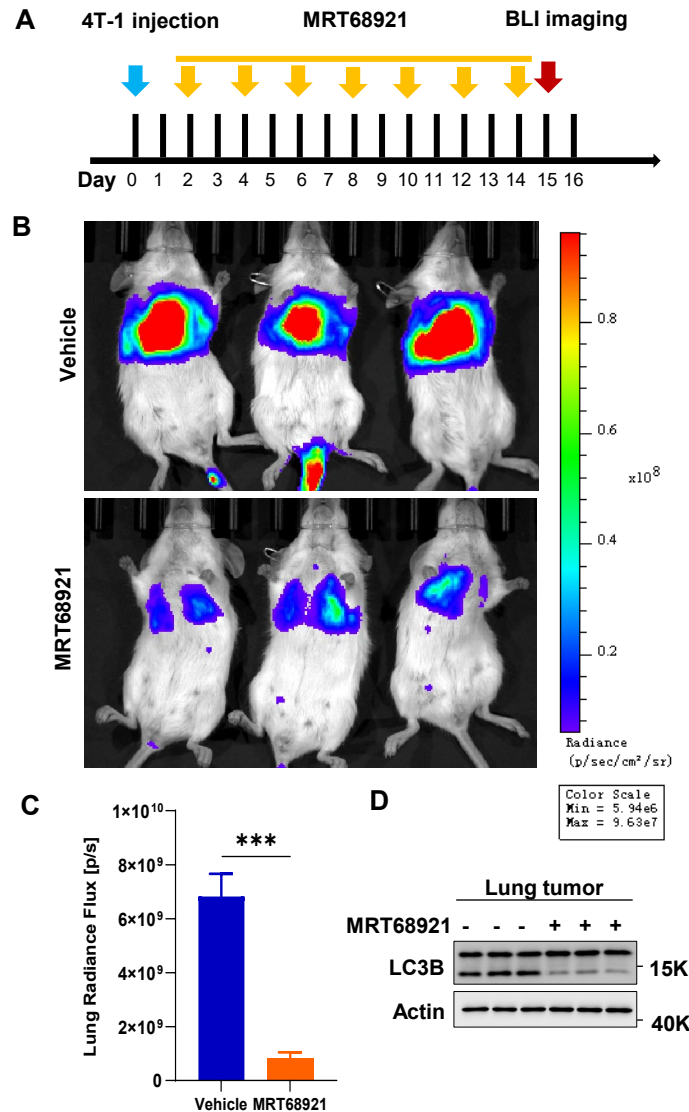

**Appendix Figure S8. Inhibition of Ulk1 with MRT68921 inhibits 4T1 cell lung metastasis in vivo.** (A-B) 4T1 cells bearing luciferase ( $2 \times 10^5$ ) were injected intravenously into the tail veins of female BALB/c mice before initiation of treatments one day later by intravenously injection with either DMSO or MRT68921 (20 mg/kg/d) every two days as indicated for seven consecutive treatments ( $n = 8$  per group) (A). On the 15th day after tumor inoculation, the mice were subjected to a lung tumor bioluminescence imaging (B) and radiance flux levels quantitated (C). Data are presented as mean  $\pm$  s.e.m. from 12 mice with either DMSO treatment ( $n=6$ ) or MRT68921 treatment ( $n=6$ ).  $P$  values were determined by a two-tailed unpaired  $t$ -test, \*\*\* $P < 0.001$ . (D) After humane sacrifice, lung tumors were dissected and subjected to Western blotting analysis against LC3B with actin a loading control.

Appendix Table S1. FIP200 interaction proteins identified by mass spectrometry

| Accession Number | Molecular Weight | Peptide number   | Peptide number    | Percent coverage | Percent coverage  |
|------------------|------------------|------------------|-------------------|------------------|-------------------|
|                  |                  | Normal Condition | Starved condition | Normal Condition | Starved condition |
| RBCC1_MOUSE      | 182 kDa          | 108              | 99                | 55.00%           | 53.10%            |
| ATG13_MOUSE      | 56 kDa           | 19               | 19                | 42.40%           | 39.30%            |
| ULK1_MOUSE       | 112 kDa          | 33               | 26                | 39.50%           | 30.00%            |
| VTI1B_MOUSE      | 27 kDa           | 4                | 6                 | 19.40%           | 29.30%            |
| ATGA1_MOUSE      | 25 kDa           | 4                | 2                 | 18.80%           | 6.88%             |
| ULK2_MOUSE       | 113 kDa          | 15               | 14                | 17.80%           | 16.40%            |
| DREB_MOUSE       | 77 kDa           | 9                | 14                | 17.30%           | 14.40%            |
| PRDX1_MOUSE      | 22 kDa           | 3                | 5                 | 15.60%           | 24.60%            |
| M2OM_MOUSE       | 34 kDa           | 4                | 20                | 14.00%           | 49.00%            |
| DPM1_MOUSE       | 29 kDa           | 2                | 2                 | 12.70%           | 12.70%            |
| CDC42_MOUSE      | 21 kDa           | 2                | 2                 | 12.60%           | 11.00%            |
| CHCH3_MOUSE      | 26 kDa           | 3                | 1                 | 12.30%           | 3.96%             |
| RAC1_MOUSE       | 21 kDa           | 2                | 3                 | 8.85%            | 16.10%            |
| CCPG1_MOUSE      | 86 kDa           | 6                | 6                 | 7.84%            | 7.44%             |
| IRGM1_MOUSE      | 47 kDa           | 3                | 2                 | 6.60%            | 4.89%             |
| CY1_MOUSE        | 35 kDa           | 2                | 2                 | 5.85%            | 8.62%             |
| RPN2_MOUSE       | 69 kDa           | 2                | 6                 | 5.07%            | 15.70%            |
| MFGM_MOUSE       | 51 kDa           | 2                | 4                 | 4.75%            | 9.72%             |
| GRB10_MOUSE      | 71 kDa           | 2                | 2                 | 3.70%            | 3.70%             |
| CC127_MOUSE      | 31 kDa           | 1                | 3                 | 3.08%            | 12.30%            |
| PP1B_MOUSE       | 37 kDa           | 1                | 5                 | 3.06%            | 19.90%            |
| UN45A_MOUSE      | 103 kDa          | 2                | 7                 | 2.75%            | 9.22%             |
| TAXB1_MOUSE      | 94 kDa           | 2                | 0                 | 2.70%            | 0                 |
| FIL1L_MOUSE      | 130 kDa          | 2                | 0                 | 2.56%            | 0                 |
| OST48_MOUSE      | 49 kDa           | 1                | 3                 | 2.04%            | 4.99%             |
| RPN1_MOUSE       | 69 kDa           | 1                | 2                 | 1.97%            | 3.62%             |
| SDPR_MOUSE       | 47 kDa           | 1                | 3                 | 1.91%            | 8.37%             |
| K1199_MOUSE      | 153 kDa          | 2                | 5                 | 1.76%            | 3.38%             |
| DPYL3_MOUSE      | 62 kDa           | 1                | 2                 | 1.75%            | 4.04%             |
| LONP2_MOUSE      | 95 kDa           | 1                | 3                 | 1.41%            | 3.76%             |
| SYNPO_MOUSE      | 100 kDa          | 1                | 3                 | 1.40%            | 4.31%             |
| RGRF1_MOUSE      | 144 kDa          | 2                | 1                 | 1.03%            | 0.56%             |
| MYPT1_MOUSE      | 115 kDa          | 0                | 8                 | 0.00%            | 7.19%             |
| PHLB2_MOUSE      | 141 kDa          | 0                | 3                 | 0.00%            | 1.60%             |
| ECHA_MOUSE       | 83 kDa           | 0                | 6                 | 0                | 9.04%             |
| MOSC2_MOUSE      | 38 kDa           | 0                | 5                 | 0                | 11.80%            |
| EHD2_MOUSE       | 61 kDa           | 0                | 6                 | 0                | 11.20%            |
| PP12C_MOUSE      | 85 kDa           | 0                | 4                 | 0                | 3.45%             |
| LETM1_MOUSE      | 83 kDa           | 0                | 2                 | 0.00%            | 4.88%             |
| SRPRB_MOUSE      | 30 kDa           | 0                | 4                 | 0                | 20.80%            |
| SSRA_MOUSE       | 32 kDa           | 0                | 3                 | 0                | 11.90%            |
| TRI27_MOUSE      | 59 kDa           | 0                | 2                 | 0                | 4.29%             |
| PALLD_MOUSE      | 152 kDa          | 0                | 2                 | 0.00%            | 1.99%             |
| NEDD4_MOUSE      | 103 kDa          | 0                | 3                 | 0                | 2.59%             |
| ILVBL_MOUSE      | 68 kDa           | 0                | 3                 | 0                | 10.30%            |
| PM34_MOUSE       | 34 kDa           | 0                | 3                 | 0                | 11.40%            |
| PP1A_MOUSE       | 38 kDa           | 0                | 3                 | 0                | 20.00%            |
| ARM10_MOUSE      | 33 kDa           | 0                | 2                 | 0                | 9.15%             |
| DPYL2_MOUSE      | 62 kDa           | 0                | 2                 | 0                | 4.02%             |
| EHD4_MOUSE       | 61 kDa           | 0                | 2                 | 0                | 3.51%             |
| KC1A_MOUSE       | 39 kDa           | 0                | 2                 | 0                | 6.53%             |
| PHB_MOUSE        | 30 kDa           | 0                | 2                 | 0                | 7.72%             |
| SGPL1_MOUSE      | 64 kDa           | 0                | 2                 | 0                | 4.05%             |
| SRC8_MOUSE       | 61 kDa           | 0                | 2                 | 0                | 3.66%             |
| STML2_MOUSE      | 38 kDa           | 0                | 2                 | 0                | 7.93%             |
| SUN2_MOUSE       | 82 kDa           | 0                | 2                 | 0                | 2.74%             |

Appendix Table S2 Antibodies and Reagents

| Antibodies                                                                       | SOURCE             | Catalogue        |
|----------------------------------------------------------------------------------|--------------------|------------------|
| Rabbit anti-FIP200                                                               | PTGLAB             | Cat#17250        |
| Rabbit anti-ATG13                                                                | CST                | Cat#13273        |
| Rabbit anti-ULK1 human                                                           | SCBT               | Cat#8054         |
| Rabbit anti-mouse-ULK1                                                           | Sigma              | Cat# sc33182     |
| Rabbit polyclonal TRIM27                                                         | Sigma              | Cat#SAB2700796   |
| Rabbit polyclonal anti-p-S495 ULK1                                               | PTM-BIO            | N/A              |
| Anti-p-S318-ATG13                                                                | NOVUS              | Cat#NBP2-19127SS |
| $\beta$ -Actin                                                                   | CST                | Cat#3700         |
| Rabbit anti-p62/SQSTM1                                                           | CST                | Cat#5114         |
| p-Ser (16B4)                                                                     | SCBT               | Cat#sc-81514     |
| p-Thr (14B3)                                                                     | SCBT               | Cat# sc-81526    |
| Mouse Monoclonal anti-STK38L                                                     | ORIGENE            | Cat#TA505176     |
| Rabbit monoclonal anti-LC3B                                                      | CST                | Cat#3868         |
| Mouse monoclonal anti-Flag-Tag                                                   | Sigma              | Cat#F3040        |
| Rabbit polyclonal anti-Myc-Tag                                                   | PTGLAB             | Cat#16286-1-AP   |
| Mouse monoclonal anti-HA-Tag                                                     | Sigma              | Cat#H9658        |
| Rabbit-anti-GST                                                                  | CST                | Cat#2625         |
| Rabbit IgG Isotype control                                                       | CST                | Cat #3900        |
| Mouse IgG1 Isotype Control                                                       | CST                | Cat#5415         |
| Mouse anti-Ubiquitin                                                             | CST                | Cat#3936         |
| Rabbit anti-Atg5                                                                 | CST                | Cat#12994        |
| Rabbit anti-Atg7                                                                 | CST                | Cat#8558         |
| Rabbit anti-ULK2                                                                 | SCBT               | Cat#sc-293453    |
| Anti-rabbit IgG (H+L), F(ab') <sub>2</sub> Fragment (Alexa Fluor® 647 Conjugate) | CST                | Cat#4414         |
| Normal Rabbit IgG                                                                | CST                | Cat#2729         |
| Dynabeads™ His-Tag Isolation and Pulldown                                        | Invitrogen™        | Cat#10103D       |
| Cycloheximide                                                                    | Sigma              | Cat#C1988        |
| MG-132                                                                           | Calbiochem         | Cat#474790       |
| Plasmocure™ - Mycoplasma Elimination Reagent                                     | Invivogen          | Cat#ant-pc       |
| Blasticidine S hydrochloride                                                     | Sigma              | Cat#15205        |
| Puromycin                                                                        | Sigma              | Cat#P8833        |
| MycoStrip™ - Mycoplasma Detection Kit                                            | Invivogen          | Cat#rep-mys-50   |
| HA Peptides                                                                      | APEX BIO           | Cat#A6004        |
| Urea                                                                             | Sigma              | Cat#8.18710      |
| Hoechst 33342                                                                    | Sigma              | Cat#B2261        |
| Corning® Costar® ultra-low attachment plate                                      | Corning®           | Cat#CLS3471      |
| Pierce™ HA-Tag Magnetic IP/Co-IP Kit                                             | Thermo Scientific™ | Cat#88838        |
| Clean-Blot™ IP detection reagent (HRP)                                           | Thermo Scientific™ | Cat#21230        |

|                                                        |                        |                |
|--------------------------------------------------------|------------------------|----------------|
| Gibco™ DMEM, high glucose                              | Gibco™                 | Cat#11584486   |
| GlutaMAX™ Supplement                                   | Gibco™                 | Cat#35050061   |
| Trypsin-EDTA (0.25%)                                   | Gibco™                 | Cat#25200056   |
| Alkaline Phosphatase, Calf Intestinal (CIP)            | NEW ENGLAND<br>BioLabs | Cat#M0290S     |
| Lambda Protein Phosphatase                             | NEW ENGLAND<br>BioLabs | Cat#P0753S     |
| UBE1                                                   | R & D SYSTEMS          | Cat#E-305-025  |
| UBE2D3                                                 | R & D SYSTEMS          | Cat#E2-627-100 |
| HIS-Ubiquitin                                          | R & D SYSTEMS          | Cat#U-530-02M  |
| HIS-Ubiquitin K48                                      | R & D SYSTEMS          | Cat#UM-HK480   |
| HIS-Ubiquitin K63                                      | R & D SYSTEMS          | Cat#UM-HK630   |
| Pierce™ Protein A/G Agarose                            | Thermo Scientific™     | Cat#20421      |
| cOmplete™, Mini, EDTA-free Protease Inhibitor Cocktail | Roche                  | Cat#4693159001 |
| Anti-FLAG® M2 Magnetic Beads                           | Millipore              | Cat#M8823      |
| D-PBS                                                  | Gibco™                 | Cat#14040141   |
| 2-Mercaptoethanol                                      | Sigma                  | Cat#M7522      |
| Sodium Pyruvate (100 mM)                               | Gibco™                 | Cat#11360070   |
| DMEM/F12 ((without HEPES, with L-glutamine))           | Gibco™                 | Cat#11320033   |
| HBSS, calcium, magnesium, no phenol red                | Gibco™                 | Cat#14025076   |
| Penicillin-Streptomycin (10,000 U/mL)                  | Gibco™                 | Cat# 15140122  |
| BSA fraction V                                         | ThermoFisher           | Cat#15260037   |
| FBS                                                    | Gibco™                 | Cat#26140087   |
| TRIzol™ Reagent                                        | Invitrogen             | Cat# 15596026  |
| PrimeScript™ RT reagent kit                            | Takara                 | Cat#DRR037A    |
| SYBR™ Green PCR Master Mix                             | Applied Biosystems™    | Cat# 4309155   |
| ULK1 101                                               | Selleck                | Cat#S8793      |
| SBI-0206965                                            | Selleck                | Cat#S7885      |
| SBP-7455                                               | Selleck                | Cat#S3393      |
| MRT68921                                               | Selleck                | Cat#S7949      |
| MRT67307                                               | Selleck                | Cat#S7948      |

Appendix Table S3. Recombinant DNA constructs

| Recombinant DNA Constructs |            |     |
|----------------------------|------------|-----|
| Flag-TRIM27                | This Paper | N/A |
| Flag-ΔR-TRIM27             | This Paper | N/A |
| Flag-ΔRB-TRIM27            | This Paper | N/A |
| Flag-ΔRFP-TRIM27           | This Paper | N/A |
| Flag-ΔRBCC-TRIM27          | This Paper | N/A |
| Myc-TRIM27                 | This Paper | N/A |
| HA-TRIM27                  | This Paper | N/A |
| HA-ULK1                    | This Paper | N/A |
| HA-ULK1 150-1051AA         | This Paper | N/A |
| HA-ULK1 278-1051AA         | This Paper | N/A |
| HA-ULK1 330-1051AA         | This Paper | N/A |
| HA-ULK1 500-1051AA         | This Paper | N/A |
| HA-ULK1 600-1051AA         | This Paper | N/A |
| HA-ULK1 828-1051AA         | This Paper | N/A |
| HA-ULK1 1-500AA            | This Paper | N/A |
| HA-ULK1 1-600AA            | This Paper | N/A |
| HA-ULK1 1-828AA            | This Paper | N/A |
| HA-ULK1 K568R              | This Paper | N/A |
| HA-ULK1 K571R              | This Paper | N/A |
| HA-ULK1 K568/571R          | This Paper | N/A |
| HA-hULK1 S495A             | This Paper | N/A |
| HA-ULK1 S494A              | This Paper | N/A |
| HA-ULK1 T754A              | This Paper | N/A |
| HA-ULK1 S405A              | This Paper | N/A |
| HA-ULK1 S774A              | This Paper | N/A |
| HA-ULK1 S543A              | This Paper | N/A |
| HA-ULK1 S465A              | This Paper | N/A |
| HA-ULK1 S614A              | This Paper | N/A |
| HA-ULK1 S450A              | This Paper | N/A |
| HA-ULK1 T653A              | This Paper | N/A |
| HA-ULK1 S757A              | This Paper | N/A |
| HA-FIP200                  | This Paper | N/A |
| HA-ATG13                   | This Paper | N/A |
| GST-TRIM27                 | This Paper | N/A |
| GST-STK38L                 | This Paper | N/A |
| GST-STK38L K119A           | This Paper | N/A |
| Flag-STK38L                | This Paper | N/A |
| Myc-STK38L                 | This Paper | N/A |
| Myc-STK38L K119A           | This Paper | N/A |

|                                      |            |     |
|--------------------------------------|------------|-----|
| Myc-STK38L K432/K434R                | This Paper | N/A |
| Myc-STK38L K1-13R                    | This Paper | N/A |
| Myc-STK38L K14-27R                   | This Paper | N/A |
| Myc-STK38L K28-38R                   | This Paper | N/A |
| Myc-STK38L K1-38R                    | This Paper | N/A |
| Myc-STK38L K1-16R                    | This Paper | N/A |
| Myc-STK38L K1-19R                    | This Paper | N/A |
| Myc-STK38L K432/K434                 | This Paper | N/A |
| Myc-STK38L K181/K432/K434            | This Paper | N/A |
| Myc-STK38L K182/K432/K434            | This Paper | N/A |
| Myc-STK38L K215/K224/K432/K434       | This Paper | N/A |
| Myc-STK38L K181/K215/K224/K432/K434R | This Paper | N/A |
| Myc-STK38L R181/215/224/432/434K     | This Paper | N/A |
| GFP-TRIM27                           | This Paper | N/A |
| Cherry-ULK1                          | This Paper | N/A |
| His-Ub                               | This Paper | N/A |
| His-Ub K6                            | This Paper | N/A |
| His-Ub K11                           | This Paper | N/A |
| His-Ub K27                           | This Paper | N/A |
| His-Ub K29                           | This Paper | N/A |
| His-Ub K33                           | This Paper | N/A |
| His-Ub K48                           | This Paper | N/A |
| His-Ub K63                           | This Paper | N/A |
| His-Ub K48                           | This Paper | N/A |
| His-Ub K63                           | This Paper | N/A |
| His-Ub K6R                           | This Paper | N/A |
| Myc-NEDD4                            | This Paper | N/A |
| Myc-NEDD4L                           | This Paper | N/A |
| HA-ULK2                              | This Paper | N/A |

Appendix Table S4 Oligonucleotide sequences

| lentiCRISPR sequences | v2 | gRNA | Sequence (5'→3')     |
|-----------------------|----|------|----------------------|
| TRIM27 KO-human       |    |      | ATGGCCGCAGTCGAGCATCA |
| ULK1 KO-human         |    |      | CGAAGGCGCCGTGGCCGATC |
| ATG13 KO-mouse        |    |      | CGCTCATCATCTTCCCCGAC |
| STK38L KO-human       |    |      | GACTGTAGCCAAGCTCACAT |

| shRNA sequences     | Sequence (5'→3')      |
|---------------------|-----------------------|
| shTRIM27-1<br>human | GGACCATAGGTGTCTGTGA   |
| shTRIM27-2<br>human | GCGGTACAGTTACCTCAA    |
| shSTK38L-1<br>human | GAACCGGACTACAAATCCA   |
| shSTK38L-2<br>human | GCAGACTGGTTACAACAAA   |
| shJAK1-1<br>human   | GCGATATATTCCAGAAACATT |
| shJAK1-2<br>human   | GACAGTCACAAGACTTGTGAA |
| shULK2-1<br>human   | GTCAGTGGTATTCGCATCAA  |
| shULK2-2<br>human   | GCAGACCGAAGATATTGTTTA |
| shATG5-1<br>human   | GCAGAACCATACTATTGCTT  |
| shATG5-2<br>human   | GATTCATGGAATTGAGCCAAT |
| shATG7-1<br>human   | GCCTGCTGAGGAGCTCTCCAT |
| shATG7-2<br>human   | CCCAGCTATTGGAACACTGTA |
| shAtg5-1<br>mouse   | GCATCTGAGCTACCCAGATAA |
| shAtg7-1<br>mouse   | CCAGCTCTGAACTCAATAATA |
| shULK1-1<br>human   | ACATCGAGAACGTCACCAAGT |
| shULK1-2<br>human   | GCCCTTTGCGTTATATTGTAT |

| qRT-PCR Primers | Forward (5'→3')      | Reverse (5'→3')         |
|-----------------|----------------------|-------------------------|
| qRT-β-actin     | GTGGCCGAGGACTTTGATTG | CCTGTAACAACGCATCTCATATT |
| qRT-TRIM27      | TTCATCGCCGGGAGACATTA | GGCTGAGGTTACTCCACCTT    |
| qRT-ULK1        | GAGAGGCTCATCTTCAGCCA | TTGCACTTGGTGACGTTCTC    |
| qRT-STK38L      | ACCAGACTTGGCTTGGATGA | ATATGGGCCACCTGCTCTTT    |
| qRT-JAK1        | TTGATGCCAGCTCACTGGAG | AGCCATCCCTAGACACTCGT    |



Appendix Table S5. TRIM27 interaction proteins identified by mass spectrometry

| Number | Accession        | Score | Mass   | Matched Peptide Sequences | emPAI |
|--------|------------------|-------|--------|---------------------------|-------|
| 1      | A0A1U9X8R9_HUMAN | 419   | 59763  | 13 (10)                   | 0.9   |
| 2      | YBOX1_HUMAN      | 400   | 35903  | 13 (8)                    | 1.03  |
| 3      | A0A024RAQ1_HUMAN | 149   | 40066  | 5 (3)                     | 0.27  |
| 4      | B4DEP6_HUMAN     | 377   | 66146  | 18 (11)                   | 0.97  |
| 5      | ST38L_HUMAN      | 108   | 54196  | 11 (5)                    | 0.42  |
| 6      | ANM5_HUMAN       | 311   | 73322  | 20 (15)                   | 1.2   |
| 7      | A0A024RCA7_HUMAN | 277   | 11658  | 5 (5)                     | 5.11  |
| 8      | GGOB1_HUMAN      | 267   | 377215 | 28 (11)                   | 0.1   |
| 9      | EF2_HUMAN        | 254   | 96246  | 14 (12)                   | 0.54  |
| 10     | A0A024RBH2_HUMAN | 249   | 66097  | 9 (5)                     | 0.27  |
| 11     | RS3A_HUMAN       | 245   | 30154  | 9 (5)                     | 0.87  |
| 12     | EF1A1_HUMAN      | 206   | 50451  | 9 (6)                     | 0.66  |
| 13     | Q3MIH3_HUMAN     | 190   | 15004  | 7 (5)                     | 2.41  |
| 14     | ICLN_HUMAN       | 188   | 26370  | 4 (4)                     | 0.81  |
| 15     | SYTL2_HUMAN      | 174   | 105150 | 13 (9)                    | 0.32  |
| 16     | A0A0D9SGF6_HUMAN | 165   | 288226 | 15 (6)                    | 0.08  |
| 17     | AT1A1_HUMAN      | 161   | 114135 | 6 (4)                     | 0.12  |
| 18     | TKT_HUMAN        | 152   | 68519  | 10 (7)                    | 0.39  |
| 19     | D0PNI1_HUMAN     | 152   | 27899  | 5 (5)                     | 0.76  |
| 20     | A0A0A0MRM8_HUMAN | 151   | 146293 | 5 (3)                     | 0.07  |
| 21     | LAP2A_HUMAN      | 150   | 76016  | 6 (4)                     | 0.18  |
| 22     | A0A024R8S5_HUMAN | 149   | 57480  | 7 (4)                     | 0.25  |
| 23     | ALDOA_HUMAN      | 141   | 39851  | 4 (4)                     | 0.49  |
| 24     | A0A109NGN6_HUMAN | 144   | 26565  | 3 (3)                     | 0.61  |
| 25     | ASPH_HUMAN       | 144   | 86266  | 1 (1)                     | 0.08  |
| 26     | SYEP_HUMAN       | 141   | 172080 | 9 (5)                     | 0.1   |
| 27     | A0A1U9X972_HUMAN | 126   | 229209 | 9 (3)                     | 0.04  |
| 28     | MBD4_HUMAN       | 124   | 66808  | 12 (6)                    | 0.33  |
| 29     | TR150_HUMAN      | 117   | 108658 | 10 (5)                    | 0.19  |
| 30     | H0Y4R1_HUMAN     | 116   | 51549  | 4 (2)                     | 0.13  |
| 31     | TCPQ_HUMAN       | 113   | 60153  | 8 (5)                     | 0.3   |
| 32     | H0Y7A7_HUMAN     | 103   | 20863  | 2 (1)                     | 0.35  |
| 33     | H0UI66_HUMAN     | 102   | 118485 | 7 (3)                     | 0.09  |
| 34     | A0A0F7NGI8_HUMAN | 102   | 83266  | 4 (1)                     | 0.04  |
| 35     | A0A024RDG1_HUMAN | 101   | 108740 | 3 (1)                     | 0.03  |
| 36     | A0A0U1RQF0_HUMAN | 101   | 275649 | 10 (5)                    | 0.06  |
| 37     | A0A087WVQ6_HUMAN | 97    | 193703 | 4 (3)                     | 0.05  |
| 38     | PSB6_HUMAN       | 96    | 25570  | 5 (3)                     | 0.45  |
| 39     | EFTU_HUMAN       | 96    | 49852  | 8 (3)                     | 0.21  |
| 40     | A0A087WZK9_HUMAN | 95    | 39736  | 2 (2)                     | 0.17  |
| 41     | COPG1_HUMAN      | 94    | 98967  | 7 (3)                     | 0.1   |
| 42     | PCM1_HUMAN       | 94    | 230057 | 7 (4)                     | 0.06  |
| 43     | A0A024R652_HUMAN | 94    | 102152 | 6 (2)                     | 0.07  |
| 44     | F262_HUMAN       | 92    | 58953  | 6 (2)                     | 0.11  |
| 45     | Q6IAX2_HUMAN     | 86    | 18610  | 4 (2)                     | 0.65  |
| 46     | A0A090N8Y2_HUMAN | 86    | 73229  | 4 (2)                     | 0.09  |
| 47     | A0A0A0N0M2_HUMAN | 85    | 134831 | 7 (1)                     | 0.02  |
| 48     | COPA_HUMAN       | 85    | 139797 | 6 (3)                     | 0.1   |
| 49     | CAMP3_HUMAN      | 85    | 135464 | 9 (4)                     | 0.1   |
| 50     | CALX_HUMAN       | 84    | 67982  | 3 (2)                     | 0.1   |
