# Supplementary material
Source: PubMed Central journal article supplement (PMC9289709)

Fig 6C

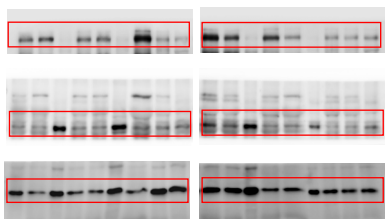

Fig 6G

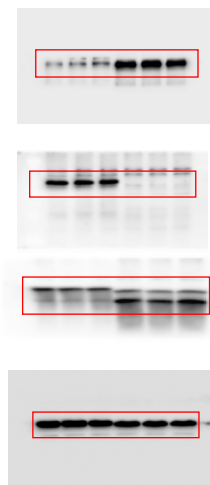

Supplement: EMBJ-41-e109777-s003.pdf [file EMBJ-41-e109777-s003.pdf]

Fig 3A

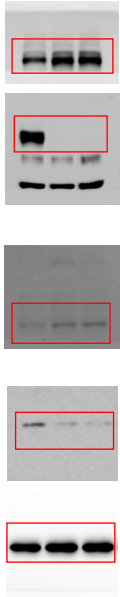

Fig 3B

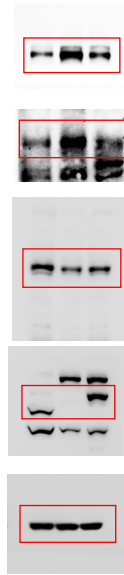

Fig 3C

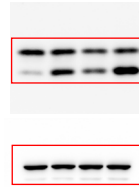

Fig 3D

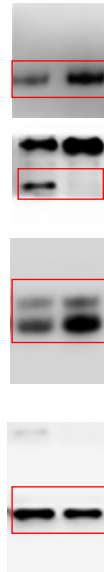

Fig 3I

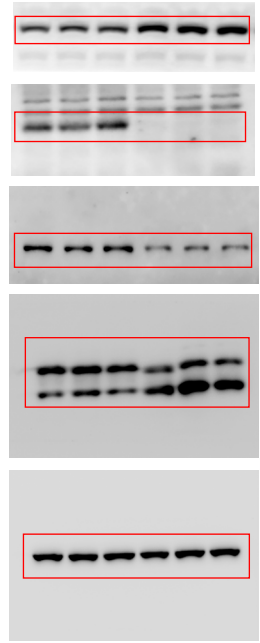

Supplement: EMBJ-41-e109777-s004.pdf [file EMBJ-41-e109777-s004.pdf]

Fig 2A

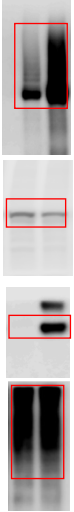

Fig 2B

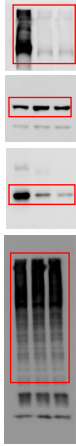

Fig 2C

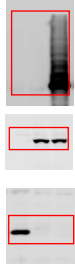

Fig 2D

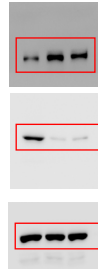

Fig 2E

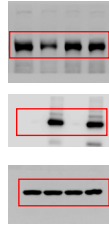

Fig 2M

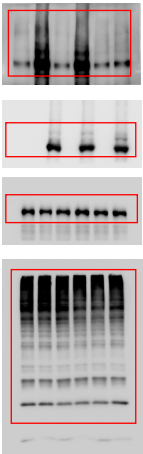

Fig 2K

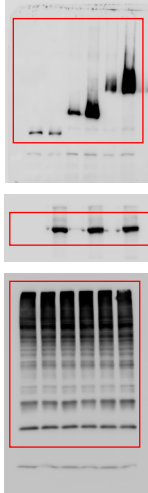

Fig 2G

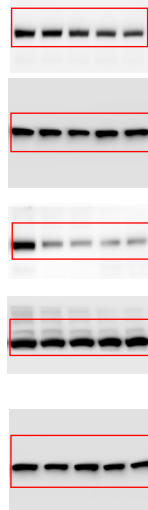

Fig 2I

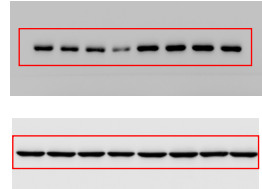

Fig 2L

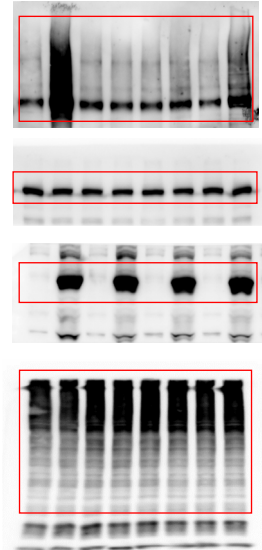

Fig 2O

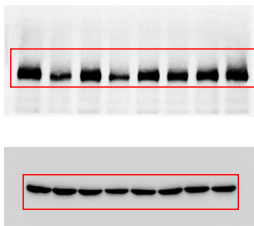

Fig 2N

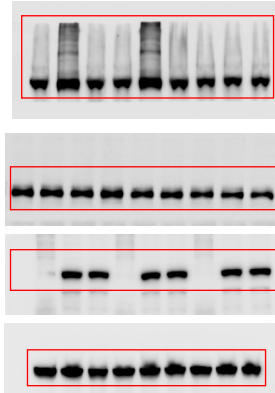

Supplement: EMBJ-41-e109777-s006.pdf [file EMBJ-41-e109777-s006.pdf]

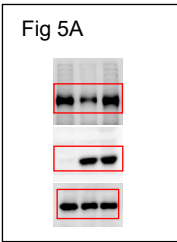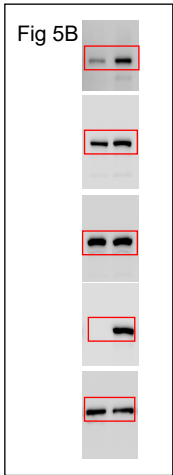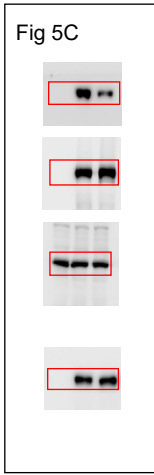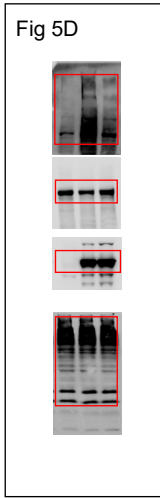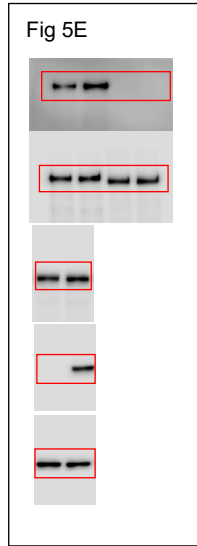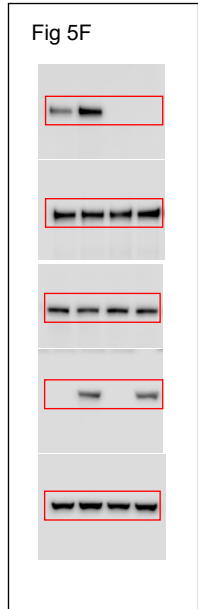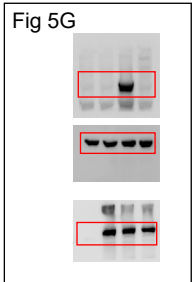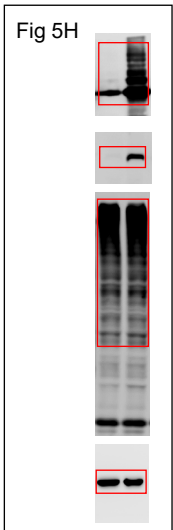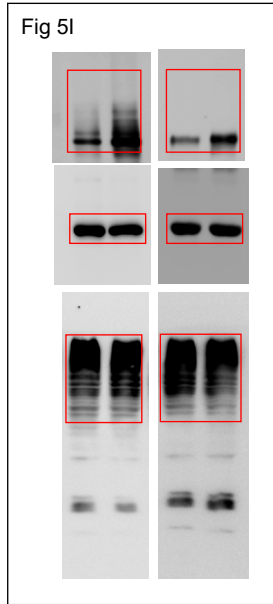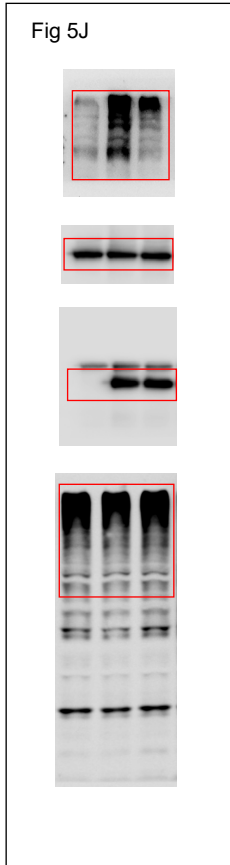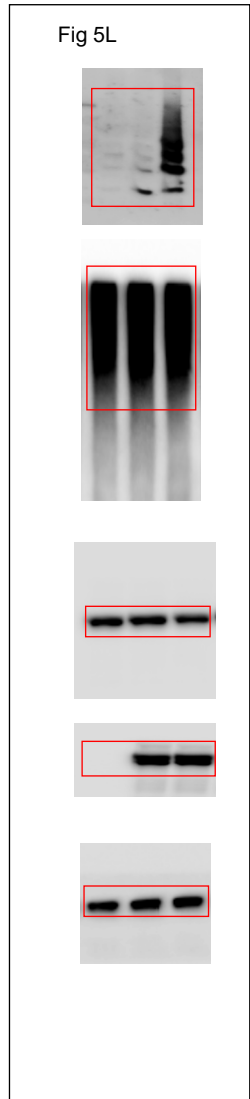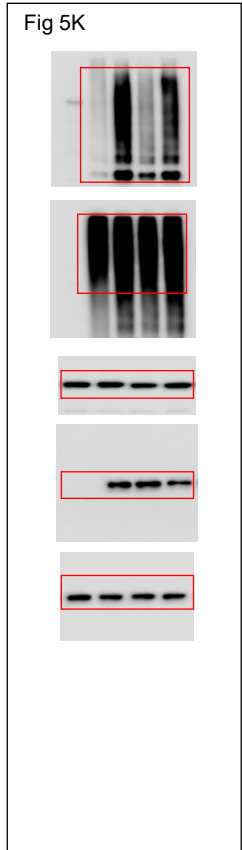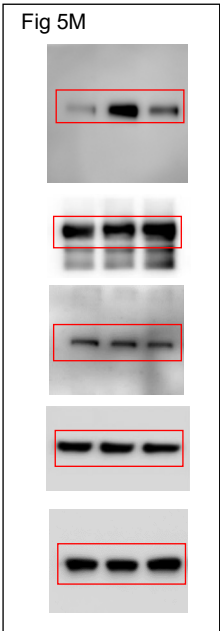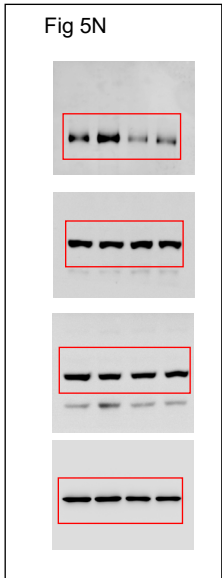

Supplement: EMBJ-41-e109777-s008.pdf [file EMBJ-41-e109777-s008.pdf]

Fig 1B

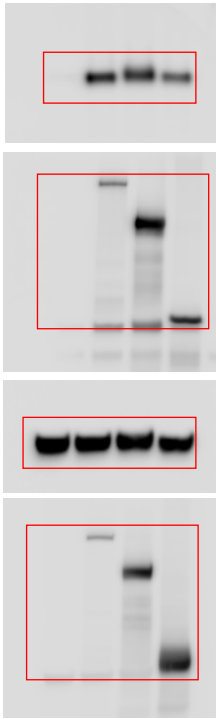

Fig 1C

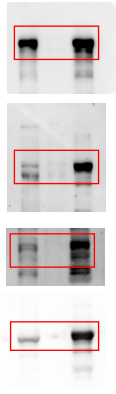

Fig 1D

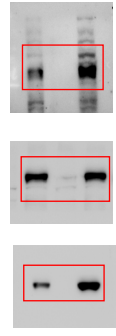

Fig 1E

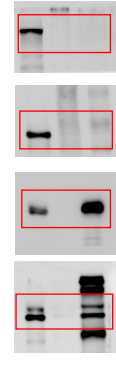

Fig 1F

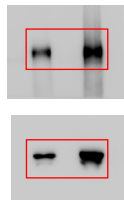

Fig 1I

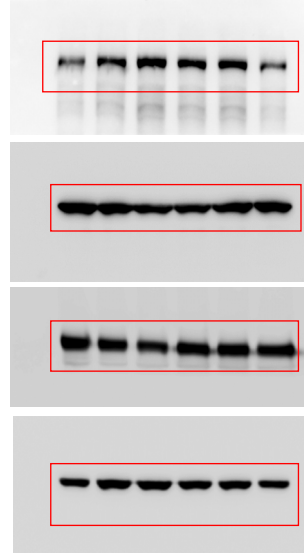

Fig 1J

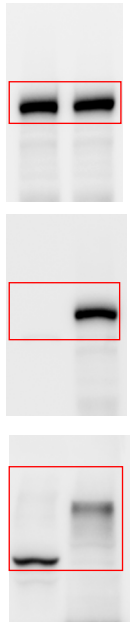

Fig 1G

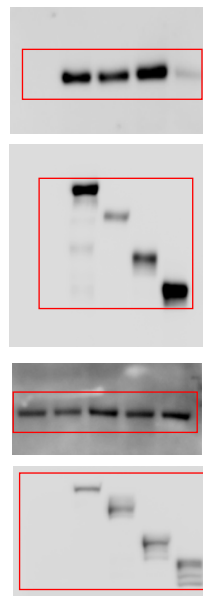

Fig 1H

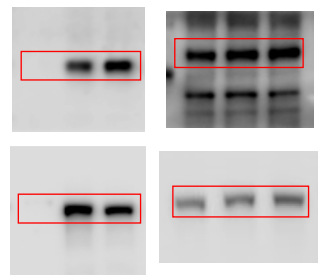

Supplement: EMBJ-41-e109777-s009.pdf [file EMBJ-41-e109777-s009.pdf]

Fig 4A

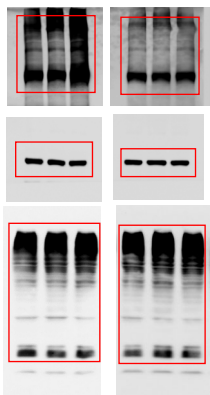

Fig 4B

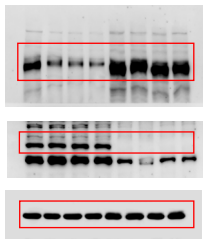

Fig 4C

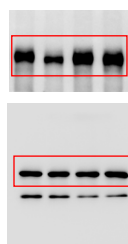

Fig 4E

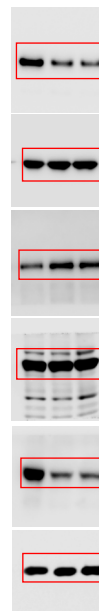

Fig 4H

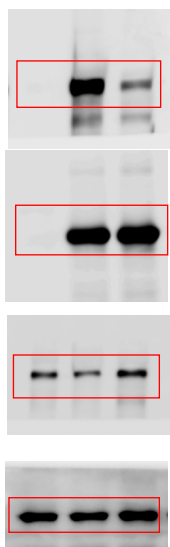

Fig 4F

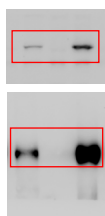

Fig 4G

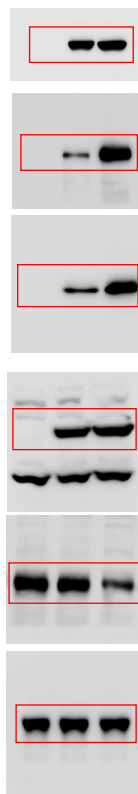

Fig 4J

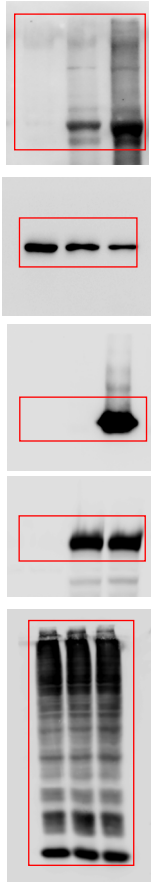

Fig 4I

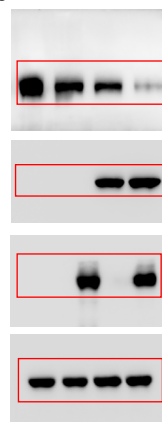

Fig 4K

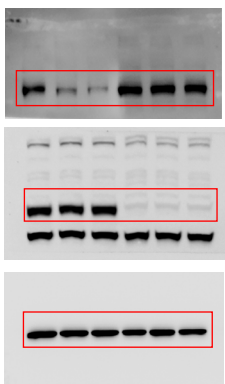

Fig 4L

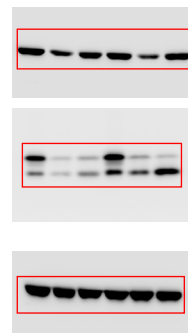

Supplement: EMBJ-41-e109777-s010.pdf [file EMBJ-41-e109777-s010.pdf]
